# Supplementary material for: The Nocardia cyriacigeorgica GUH-2 genome shows ongoing adaptation of an environmental Actinobacteria to a pathogen’s lifestyle
Source: PubMed Central journal article supplement (PMC3751702; doi:10.1186/1471-2164-14-286), 2013-04-27
Supplement: 1471-2164-14-286-S4.pdf [file 1471-2164-14-286-S4.pdf]

| COG ID | Occurrence, (%)           |                     |                  |                |                     |                        |                      |                       |                        |
|--------|---------------------------|---------------------|------------------|----------------|---------------------|------------------------|----------------------|-----------------------|------------------------|
|        | <i>N. cyriacigeorgica</i> | <i>N. farcinica</i> | <i>R. jostii</i> | <i>R. equi</i> | <i>M. smegmatis</i> | <i>M. tuberculosis</i> | <i>C. glutamicum</i> | <i>C. diphtheriae</i> | <i>A. mediterranei</i> |
| A      | 1 (0.02)                  | 1 (0.02)            | 1 (0.01)         | 1 (0.03)       | 1 (0.02)            | 1 (0.03)               | 1 (0.04)             | 1 (0.06)              | 1 (0.01)               |
| B      | 2 (0.05)                  | 3 (0.07)            | 1 (0.01)         | 1 (0.03)       | 2 (0.04)            | 2 (0.07)               | 0 (0.00)             | 0 (0.00)              | 2 (0.02)               |
| C      | 340 (8.47)                | 379 (8.91)          | 741 (10.96)      | 352 (9.26)     | 614 (11.42)         | 281 (9.51)             | 173 (7.49)           | 129 (7.17)            | 644 (6.45)             |
| D      | 52 (1.29)                 | 51 (1.20)           | 69 (1.02)        | 45 (1.18)      | 51 (0.95)           | 46 (1.56)              | 34 (1.47)            | 28 (1.56)             | 71 (0.71)              |
| E      | 668 (16.63)               | 732 (17.21)         | 1282 (18.96)     | 741 (19.49)    | 1051 (19.55)        | 481 (16.27)            | 471 (20.39)          | 335 (18.63)           | 1246 (12.48)           |
| F      | 114 (2.84)                | 127 (2.99)          | 197 (2.91)       | 124 (3.26)     | 171 (3.18)          | 105 (3.55)             | 95 (4.11)            | 84 (4.67)             | 184 (1.84)             |
| G      | 378 (9.41)                | 367 (8.63)          | 714 (10.56)      | 366 (9.63)     | 615 (11.44)         | 237 (8.02)             | 290 (12.55)          | 180 (10.01)           | 937 (9.38)             |
| H      | 202 (5.03)                | 212 (4.98)          | 290 (4.29)       | 175 (4.60)     | 234 (4.35)          | 157 (5.31)             | 129 (5.58)           | 114 (6.34)            | 313 (3.13)             |
| I      | 384 (9.56)                | 408 (9.59)          | 797 (11.79)      | 435 (11.44)    | 607 (11.29)         | 314 (10.62)            | 98 (4.24)            | 77 (4.28)             | 587 (5.88)             |
| J      | 206 (5.13)                | 237 (5.57)          | 252 (3.73)       | 205 (5.39)     | 216 (4.02)          | 178 (6.02)             | 182 (7.88)           | 173 (9.62)            | 265 (2.65)             |
| K      | 636 (15.84)               | 657 (15.44)         | 904 (13.37)      | 484 (12.73)    | 674 (12.54)         | 254 (8.59)             | 232 (10.04)          | 158 (8.79)            | 1246 (12.48)           |
| L      | 245 (6.10)                | 280 (6.58)          | 479 (7.08)       | 182 (4.79)     | 297 (5.53)          | 250 (8.46)             | 201 (8.70)           | 202 (11.23)           | 343 (3.43)             |
| M      | 186 (4.63)                | 180 (4.23)          | 248 (3.67)       | 162 (4.26)     | 208 (3.87)          | 139 (4.70)             | 122 (5.28)           | 93 (5.17)             | 359 (3.59)             |
| N      | 75 (1.87)                 | 81 (1.90)           | 92 (1.36)        | 63 (1.66)      | 85 (1.58)           | 52 (1.76)              | 30 (1.30)            | 42 (2.34)             | 114 (1.14)             |
| O      | 154 (3.83)                | 171 (4.02)          | 225 (3.33)       | 484 (12.73)    | 175 (3.26)          | 156 (5.28)             | 105 (4.55)           | 158 (8.79)            | 256 (2.56)             |
| P      | 449 (11.18)               | 496 (11.66)         | 817 (12.08)      | 533 (14.02)    | 673 (12.52)         | 279 (9.44)             | 359 (15.54)          | 239 (13.29)           | 740 (7.41)             |
| Q      | 391 (9.74)                | 388 (9.12)          | 691 (10.22)      | 343 (9.02)     | 578 (10.75)         | 361 (12.21)            | 81 (3.51)            | 52 (2.89)             | 637 (6.38)             |
| R      | 978 (24.35)               | 1000 (23.51)        | 1676 (24.79)     | 940 (24.73)    | 1325 (24.65)        | 642 (21.72)            | 494 (21.39)          | 299 (16.63)           | 1761 (17.63)           |
| S      | 272 (6.77)                | 270 (6.35)          | 425 (6.29)       | 252 (6.63)     | 325 (6.05)          | 206 (6.97)             | 191 (8.27)           | 136 (7.56)            | 434 (4.35)             |
| T      | 310 (7.72)                | 297 (6.98)          | 419 (6.20)       | 213 (5.60)     | 300 (5.58)          | 183 (6.19)             | 111 (4.81)           | 105 (5.84)            | 570 (5.71)             |
| U      | 46 (1.15)                 | 47 (1.10)           | 50 (0.74)        | 51 (1.34)      | 45 (0.84)           | 52 (1.76)              | 34 (1.47)            | 33 (1.84)             | 79 (0.79)              |
| V      | 141 (3.51)                | 155 (3.64)          | 168 (2.48)       | 120 (3.16)     | 144 (2.68)          | 76 (2.57)              | 103 (4.46)           | 85 (4.73)             | 221 (2.21)             |
| W      | 1 (0.02)                  | 0 (0.00)            | 0 (0.00)         | 1 (0.03)       | 1 (0.02)            | 0 (0.00)               | 0 (0.00)             | 0 (0.00)              | 4 (0.04)               |
| Tot:   | 4016                      | 4254                | 6761             | 3801           | 5375                | 2956                   | 2310                 | 1798                  | 7106                   |
