# Supplementary material for: The Nocardia cyriacigeorgica GUH-2 genome shows ongoing adaptation of an environmental Actinobacteria to a pathogen’s lifestyle
Source: PubMed Central journal article supplement (PMC3751702; doi:10.1186/1471-2164-14-286), 2013-04-27
Supplement: 1471-2164-14-286-S10.pdf [file 1471-2164-14-286-S10.pdf]

| COG process                                  | Occurrence, (%)           |                     |                  |                |                     |                        |                      |                       |                        |
|----------------------------------------------|---------------------------|---------------------|------------------|----------------|---------------------|------------------------|----------------------|-----------------------|------------------------|
|                                              | <i>N. cyriacigeorgica</i> | <i>N. farcinica</i> | <i>R. jostii</i> | <i>R. equi</i> | <i>M. smegmatis</i> | <i>M. tuberculosis</i> | <i>C. glutamicum</i> | <i>C. diphtheriae</i> | <i>A. mediterranei</i> |
| SP <sup>(1)</sup> >0,5 TMh <sup>(2)</sup> <3 | 263 (4.80)                | 281 (4.70)          | 249 (3.16)       | 256 (5.00)     | 326 (4.38)          | 184 (4.13)             | 129 (4.12)           | 139 (5.58)            | 621 (6.22)             |
| Cellular process and signaling               | 53 (20.15)                | 70 (24.91)          | 74 (29.72)       | 58 (22.66)     | 74 (22.70)          | 41 (22.28)             | 33 (25.58)           | 34 (24.46)            | 125 (20.13)            |
| Information storage and processing           | 2 (0.76)                  | 4 (1.42)            | 3 (1.20)         | 3 (1.17)       | 3 (0.92)            | 5 (2.72)               | 1 (0.78)             | 2 (1.44)              | 8 (1.29)               |
| Metabolism                                   | 51 (19.39)                | 47 (16.73)          | 66 (26.51)       | 51 (19.92)     | 77 (23.62)          | 38 (20.65)             | 21 (16.28)           | 15 (10.79)            | 147 (23.67)            |
| Poorly characterized                         | 49 (18.63)                | 45 (16.01)          | 53 (21.29)       | 42 (16.41)     | 34 (10.43)          | 27 (14.67)             | 27 (20.93)           | 9 (6.47)              | 66 (10.63)             |
| all COG                                      | 127 (48.29)               | 137 (48.75)         | 157 (63.05)      | 132 (51.56)    | 158 (48.47)         | 92 (50.00)             | 70 (54.26)           | 57 (41.01)            | 298 (47.99)            |
| Hypothetical                                 | 185 (70.34)               | 189 (67.26)         | 145 (58.23)      | 166 (64.84)    | 202 (61.96)         | 119 (64.67)            | 86 (66.67)           | 91 (65.47)            | 389 (62.64)            |
| nb of CDS in genome                          | 5477                      | 5984                | 7872             | 5124           | 7449                | 4454                   | 3128                 | 2491                  | 9988                   |

<sup>(1)</sup>SP: Signal peptide, <sup>(2)</sup>TMh: transmembrane helix domain
